# Supplementary material
Source: PubMed Central journal article supplement (PMC4283409)

# Supplementary Figure S1

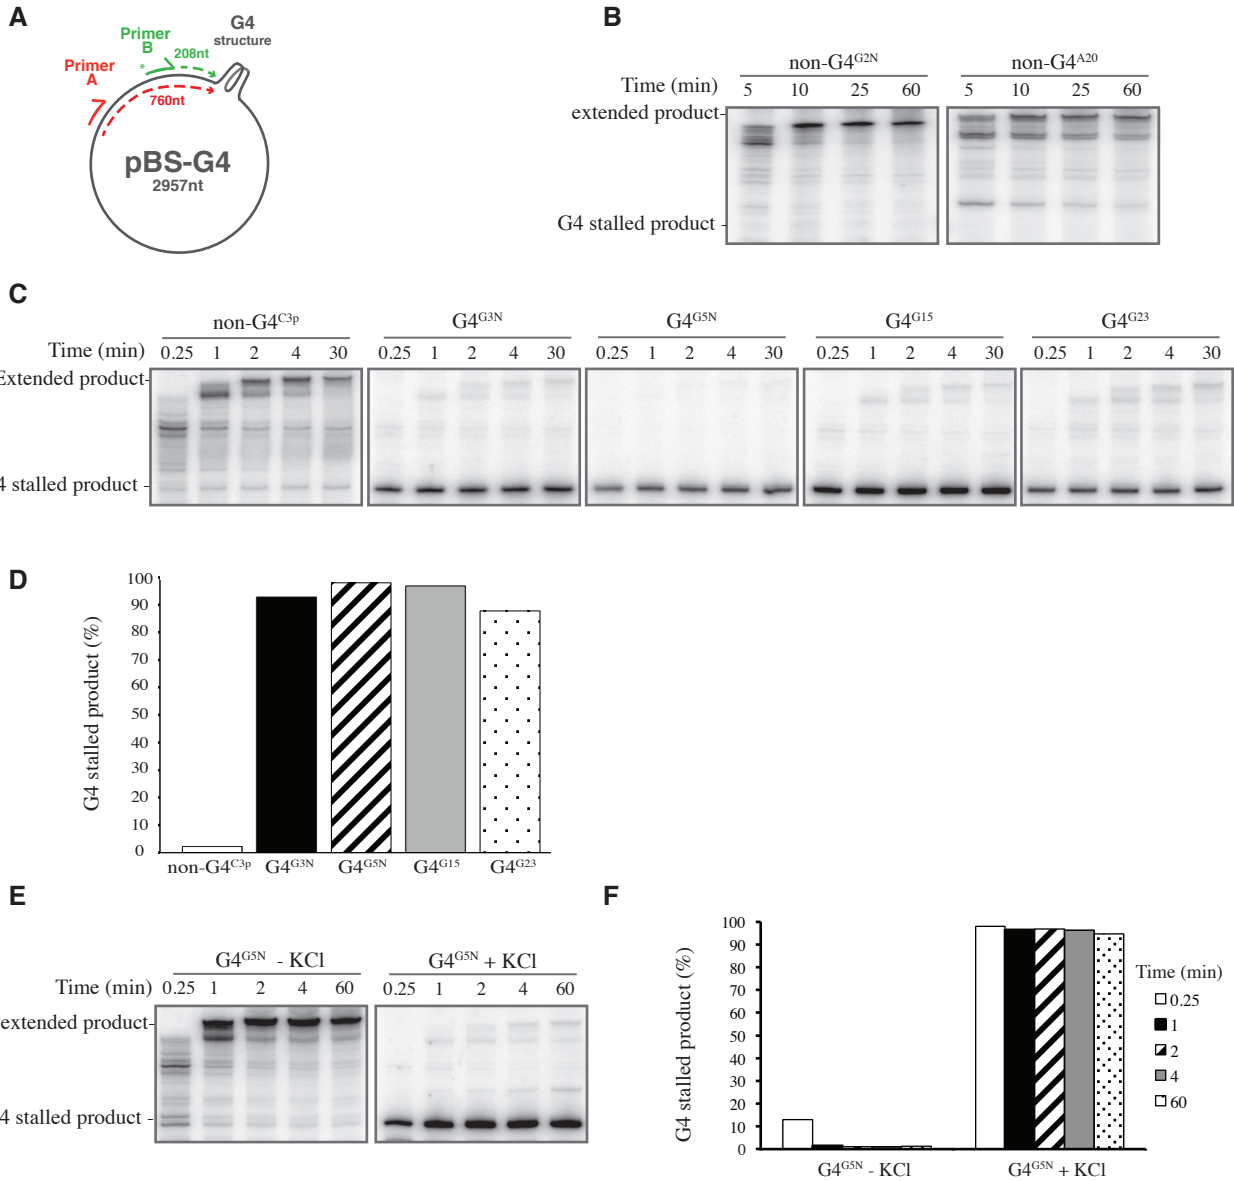

Supplement: embj0033-2521-sd2.pdf [file embj0033-2521-sd2.pdf]

# Supplementary Figure S4

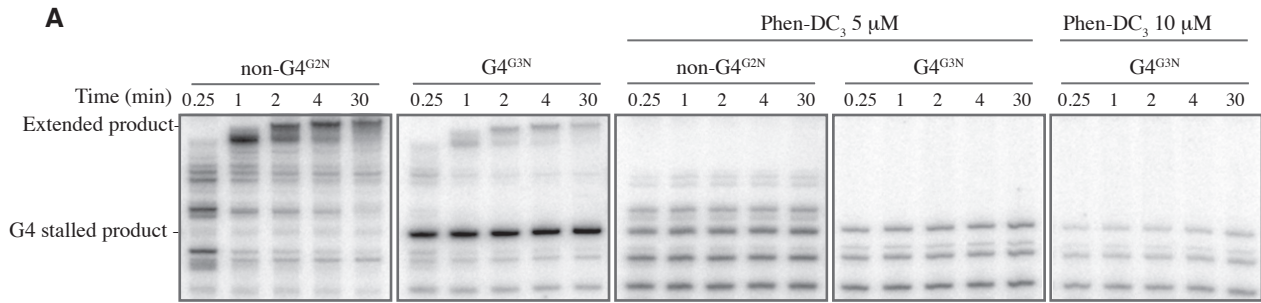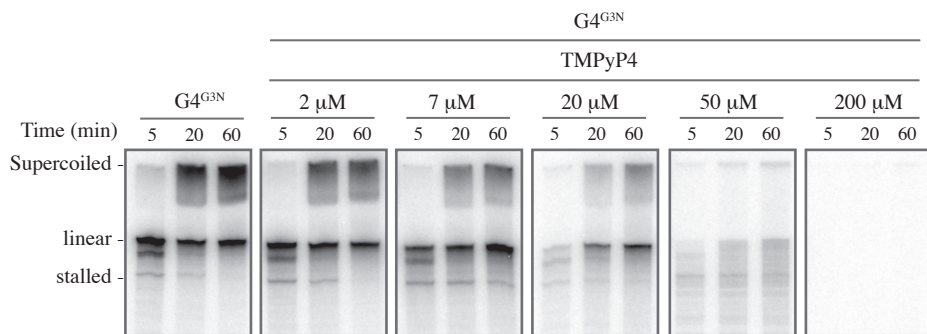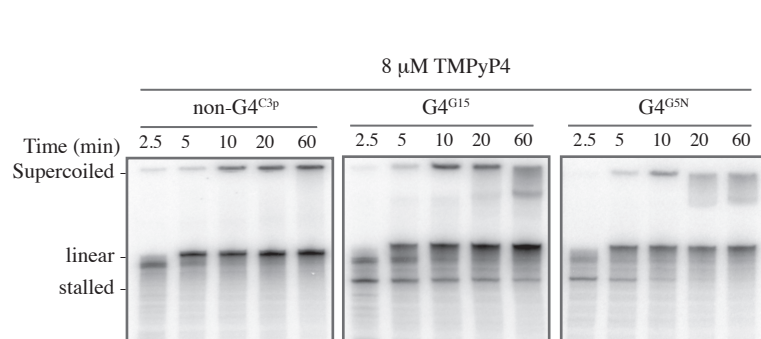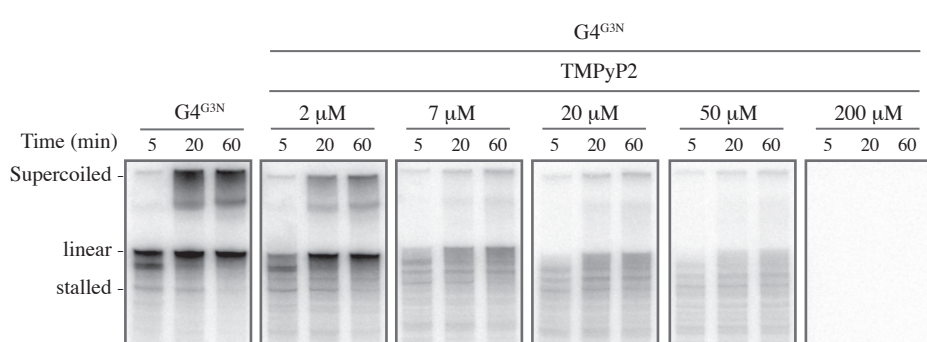

Supplement: embj0033-2521-sd5.pdf [file embj0033-2521-sd5.pdf]
